# Supplementary material for: Urban social environment and low birth weight in 360 Latin American cities
Source: Springer Nature journal article supplement (doi:10.1186/s12889-021-10886-7), 2021-04-26
Supplement: MOESM1 [file 19106642]

1 **SUPPLEMENTARY MATERIAL**

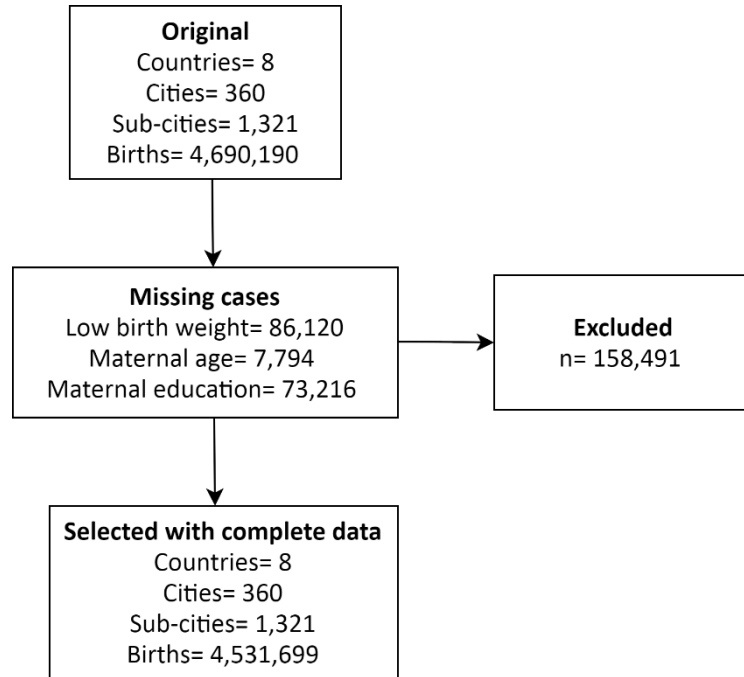

2

3

4

5

Figure S1. Flow chart describing the sample selection involving eight Latin American countries (Argentina, Brazil, Chile, Colombia, Costa Rica, Guatemala, Mexico, Peru) for year 2014.

6 Table S1. Study characteristics by country.

| Country    | Live births      | Sub-cities | Cities     | Sub-city                                |                               |
|------------|------------------|------------|------------|-----------------------------------------|-------------------------------|
|            |                  |            |            | population-level educational attainment | City social environment index |
|            | n (%)            | n (%)      | n (%)      | Median (IQR)                            | Median (IQR)                  |
| Argentina  | 506,291 (11.2)   | 110 (8.3)  | 33 (9.2)   | -0.56 (1.36)                            | 0.32 (0.05)                   |
| Brazil     | 1,726,288 (38.1) | 422 (32.0) | 152 (42.2) | 0.32 (1.77)                             | 0.28 (0.56)                   |
| Chile      | 180,534 (4.0)    | 81 (6.1)   | 21 (5.8)   | -0.68 (1.00)                            | 1.04 (0.18)                   |
| Colombia   | 404,286 (8.9)    | 84 (6.4)   | 35 (9.7)   | 0.11 (1.69)                             | 0.60 (0.59)                   |
| Costa Rica | 32,820 (0.7)     | 29 (2.2)   | 1 (0.3)    | 1.38 (1.78)                             | 0.53 (0.00)                   |
| Guatemala  | 72,761 (1.6)     | 20 (1.5)   | 3 (0.8)    | -0.74 (2.27)                            | -1.04 (0.00)                  |
| Mexico     | 1,316,954 (29.1) | 406 (30.7) | 92 (25.6)  | -0.14 (1.56)                            | 0.32 (0.65)                   |
| Peru       | 291,765 (6.4)    | 169 (12.8) | 23 (6.4)   | 1.97 (1.86)                             | 0.47 (0.17)                   |

7 Live births correspond to year 2014; Sub-city population-level educational attainment: higher values correspond to higher  
 8 population educational attainment of sub cities; City social environment index: higher values indicate better social  
 9 environment of cities; IQR, interquartile range.

10

11 Table S2. Characteristics of included and excluded cases.

|                                                                | Overall<br>n= 4,690,190 | Included<br>n= 4,531,299 | Excluded <sup>a</sup><br>n= 158,491 | Comparison<br>( <i>t</i> or $\chi^2$ )<br><i>p</i> value |
|----------------------------------------------------------------|-------------------------|--------------------------|-------------------------------------|----------------------------------------------------------|
| Low birth weight, (< 2,500 g), % distribution                  | 7.8                     | 7.8                      | 8.5                                 | < 0.001                                                  |
| Maternal education, % distribution                             |                         |                          |                                     |                                                          |
| Complete secondary and above                                   | 41.1                    | 41.2                     | 36.7                                | < 0.001                                                  |
| At least primary but less than completed secondary             | 49.6                    | 49.5                     | 57.1                                |                                                          |
| Less than primary                                              | 9.3                     | 9.3                      | 6.2                                 |                                                          |
| Maternal age, years , % distribution                           |                         |                          |                                     |                                                          |
| ≤ 19                                                           | 16.6                    | 16.5                     | 19.8                                | < 0.001                                                  |
| 20-24                                                          | 26.2                    | 26.2                     | 28.7                                |                                                          |
| 25-29                                                          | 24.2                    | 24.3                     | 22.8                                |                                                          |
| 30-34                                                          | 19.8                    | 19.9                     | 17.1                                |                                                          |
| ≥ 35                                                           | 13.1                    | 13.1                     | 11.6                                |                                                          |
| Score of sub-city population educational attainment, mean (SD) | 0.152 (1.377)           | 0.166 (1.381)            | -0.244 (1.210)                      | < 0.001                                                  |
| Score of city social environment index, mean (SD)              | 0.216 (0.519)           | 0.219 (0.518)            | 0.114 (0.556)                       | < 0.001                                                  |

Countries, % distribution

|            |      |      |      |         |
|------------|------|------|------|---------|
| Argentina  | 11.4 | 11.2 | 18.2 | < 0.001 |
| Brazil     | 37.3 | 38.1 | 13.3 |         |
| Chile      | 3.9  | 4.0  | 0.3  |         |
| Colombia   | 8.9  | 8.9  | 6.7  |         |
| Costa Rica | 0.7  | 0.7  | 0.6  |         |
| Guatemala  | 1.6  | 1.6  | 1.2  |         |
| Mexico     | 30.1 | 29.1 | 59.3 |         |
| Peru       | 6.2  | 6.4  | 0.4  |         |

---

12 <sup>a</sup> Excluded cases were those with missing data on any of the following characteristics: birth weight (n= 86,120), maternal age  
 13 (n= 7,794), or maternal education (n= 73,216).

14 Table S3. Variance components for sub-city prevalence of low birth weight in eight  
 15 Latin American countries (Argentina, Brazil, Chile, Colombia, Costa Rica,  
 16 Guatemala, Mexico and Peru) for year 2014.

| Countries (n= 8)               | Sub-city low birth weight (LBW, < 2,500 g), % |
|--------------------------------|-----------------------------------------------|
| Cities (n= 360)                | Empty model                                   |
| Sub-cities (n= 1,321)          |                                               |
| <i>Random parameters</i>       |                                               |
| Country variance (std. Error)  | 9.797 (5.116)                                 |
| City variance (std. Error)     | 1.019 (0.132)                                 |
| Sub-city variance (std. Error) | 2.021 (0.088)                                 |

17 Multilevel linear model: sub-cities nested within cities, nested within countries; outcome:  
 18 percentage of LBW (< 2,500 g) in sub-cities.

19
